# Supplementary material
Source: PubMed Central journal article supplement (PMC5134995)
Supplement: NIHMS70307-supplement-Supplementary_Appendix.pdf [file NIHMS70307-supplement-Supplementary_Appendix.pdf]

## Supplementary Appendix

This appendix has been provided by the authors to give readers additional information about their work.

Supplement to: Donovan JL, Hamdy FC, Lane JA, et al. Patient-reported outcomes after monitoring, surgery, or radiotherapy for prostate cancer. *N Engl J Med* 2016;375:1425-37. DOI: 10.1056/NEJMoa1606221

# **Appendix**

## **Supplementary material**

### **Patient-Reported Outcomes after Monitoring, Surgery, or Radiotherapy for Prostate Cancer ProtecT trial**

#### **Table of contents**

|                                                                                                                                                                                                                                | Page |
|--------------------------------------------------------------------------------------------------------------------------------------------------------------------------------------------------------------------------------|------|
| List of investigators                                                                                                                                                                                                          | 2    |
| Table S1A: Baseline sociodemographic and clinical characteristics by allocated treatment group                                                                                                                                 | 4    |
| Table S1B: Response rates for exemplar outcome measures                                                                                                                                                                        | 5    |
| Table S2: Tabular presentation of outcomes in the four key domains of urinary, sexual and bowel function and quality of life, and health-related quality of life                                                               | 6    |
| Section S3: Factors relating to the design and analysis of the ProtecT trial and its treatment policies that could affect patient-reported outcome measure scores                                                              | 19   |
| Table S3A Prostatectomy and radical radiotherapy received in each trial arm over time                                                                                                                                          | 20   |
| Table S3B. Tabular presentation of selected EPIC outcomes for urinary incontinence and erectile dysfunction, comparing the active monitoring group with those who were not radically treated within six years of randomization | 21   |

## List of investigators

### § PROTECT STUDY GROUP

#### **Principal investigators:**

Freddie C. Hamdy (Chief Investigator), Jenny L. Donovan, David E. Neal.

#### **Trial coordinator:**

J. Athene Lane.

#### **Trial statisticians:**

Tim J. Peters, Chris Metcalfe.

#### **Urologists:**

Leads: Prasad Bollina, Andrew Doble, Alan Doherty, David Gillatt, Roger Kockelbergh, Howard Kynaston, Alan Paul, Philip Powell, Stephen Prescott, Derek Rosario, Edward Rowe.

Others: John B. Anderson\*, Jonathan Aning, James Catto, Garrett Durkan, Owen Hughes, Anthony Kouparis, Hing Leung, Param Mariappan, Alan McNeill, Edgar Paez, Raj Persad, Hartwig Schwaibold, David Tulloch, Michael Wallace.

#### **Nurses:**

Leads: Susan Bonnington, Lynne Bradshaw, Deborah Cooper, Emma Elliott, Phillipa Herbert, Peter Holding, Joanne Howson, Amanda Jones, Teresa Lennon, Norma Lyons, Hilary Moody, Claire Plumb, Tricia O'Sullivan, Elizabeth Salter, Pauline Thompson, Sarah Tidball, Jan Blaikie, Catherine Gray.

Others: Tonia Adam, Sarah Askew, Sharon Atkinson, Tim Baynes, Carole Brain, Viv Breen, Sarah Brunt, Sean Bryne, Jo Bythem, Jenny Clarke, Jenny Cloete, Susan Dark, Gill Davis, Rachael De La Rue, Jane Denizot, Elspeth Dewhurst, Anna Dimes, Nicola Dixon, Penny Ebbs, Ingrid Emerson, Jill Ferguson, Ali Gadd, Lisa Geoghegan, Alison Grant, Collette Grant, Rosemary Godfrey, Louise Goodwin, Susie Hall, Liz Hart, Andrew Harvey, Chloe Hault, Sarah Hawkins, Sharon Holling, Alastair Innes, Sue Kilner, Fiona Marshall, Louise Mellen, Andrea Moore, Sally Napier, Julie Needham, Kevin Pearse, Anna Pisa, Mark Rees, Elliw Richards, Lindsay Robson, Janet Roxburgh, Nikki Samuel, Irene Sharkey, Michael Slater, Donna Smith, Pippa Taggart, Helen Taylor, Vicky Taylor, Ayesha Thomas, Briony Tomkies, Nicola Trewick, Claire Ward, Christy Walker, Ayesha Williams, Colin Woodhouse, Elizabeth Wyber.

#### **Oncologists:**

Lead: Malcolm Mason.

Others: Amit Bahl, Richard Benson, Mark Beresford, Catherine Ferguson, John Graham, Chris Herbert, Grahame Howard, Nick James, Peter Kirkbride, Alastair Law, Carmel Loughrey, Duncan McClaren, Helen Patterson\*, Ian Pedley, Trevor Roberts\*, Angus Robinson, Simon Russell, John Staffurth, Paul Symonds, Narottam Thanvi, Subramaniam Vasanthan, Paula Wilson.

#### **Histopathologists:**

Leads: Jon Oxley, Mary Robinson.

Others: Selina Bhattarai, Neeta Deshmukh, John Dormer, Malee Fernando, John Goepel, David Griffiths, Ken Grigor, Nick Mayer, Murali Varma, Anne Warren.

#### **Radiologists and medical physics:**

Helen Appleby, Dominic Ash, Dean Aston, Steven Bolton, Graham Chalmers, John Conway, Nick Early, Tony Geater, Lynda Goddall, Claire Heymann, Deborah Hicks, Liza Jones, Susan Lamb, Geoff Lambert, Gill Lawrence, Geraint Lewis, John Lilley, Aileen MacLeod, Pauline Massey, Alison McQueen, Rollo Moore, Lynda Penketh, Janet Potterton, Neil Roberts, Helen Showler, Pam Shuttleworth, Stephen Slade, Alasdair Steele,

James Swinscoe, Marie Tiffany, John Townley, Jo Treeby, Michael Weston, Joyce Wilkinson, Lorraine Williams, Lucy Wills, Owain Woodley, Sue Yarrow.

**Other researchers and data managers:**

Kerry Avery, Lucy Brindle, Linda Davies, Michael Davis, Dan Dedman, Elizabeth Down, Hanan Khazragui, Richard M. Martin, Sian Noble, Hilary Taylor, Marta Tazewell, Emma L. Turner, Julia Wade, Eleanor Walsh.

**Administrative support:**

Susan Baker, Elizabeth Bellis-Sheldon, Chantal Bougard, Joanne Bowtell, Catherine Brewer, Chris Burton, Jennie Charlton, Nicholas Christoforou, Rebecca Clark, Susan Coull, Christine Croker, Rosemary Curren, Claire Daisey, Gill Delaney, Rose Donohue, Jane Drew, Rebecca Farmer, Susan Fry, Jean Haddow, Alex Hale, Susan Halpin, Belle Harris, Barbara Hattrick, Sharon Holmes, Helen Hunt, Vicky Jackson, Donna Johnson, Mandy Le Butt, Jo Leworthy, Tanya Liddiatt, Alex Martin, Jainee Mauree, Susan Moore, Gill Moulam, Jackie Mutch, Kathleen Parker, Christopher Pawsey, Michelle Purdie, Teresa Robson, Lynne Smith, Carole Stenton, Tom Steuart-Feilding, Beth Stott, Chris Sully, Caroline Sutton, Carol Torrington, Zoe Wilkins, Sharon Williams, Andrea Wilson, Ashleigh Weaver.

The ProtecT study was designed by FCH, JLD and DEN. Data analysis was designed by CM and TJP, and conducted by CM. All authors contributed to data collection. The data are vouched for by JAL and MD, and the analysis by CM, JAL, MD and TJP. JLD wrote the first draft of the manuscript. The institutions, sponsor and funder had no role in publication. JLD, FCH and DEN decided to publish the paper.

**RECRUITMENT AT EACH SITE AND PRINCIPAL INVESTIGATORS**

Bristol (David Gillatt): 13,010  
Edinburgh (Prasad Bollina): 11,436  
Newcastle (Phillip Powell): 10,720  
Sheffield (Freddie Hamdy, Derek Rosario): 9,963  
Cardiff (Howard Kynaston): 8,890  
Leicester (Roger Kockelbergh): 8,182  
Cambridge (Andrew Doble): 8,110  
Leeds (Stephen Prescott, Alan Paul): 7,252  
Birmingham (Alan Doherty): 4,866

**JOINT PROTECT AND CAP CAUSE OF DEATH COMMITTEE**

Research lead: Richard M. Martin

Chair: Peter Albertsen

Members: Jan Adolfsson, Amit Bahl, Michael Baum, Anthony Koupparis, Jon McFarlane, Jon Oxley, Colette Reid, Mary Robinson, Emma L. Turner, Anthony Zietman.

**DATA MONITORING COMMITTEE**

Chairs: Adrian Grant\* and Ian Roberts

Members: Deborah Ashby, Richard Cowan, Peter Fayers, Killian Mellon, James N'Dow, Tim O'Brien, Michael Sokhal.

**TRIAL STEERING COMMITTEE**

Chair: Michael Baum

Members: Jan Adolfsson, Peter Albertsen, David Dearnaley, Fritz Schröder, Tracy Roberts, Anthony Zietman.

\*Deceased

**Table S1A: Baseline sociodemographic and clinical characteristics by allocated treatment group**

|                                                         | Active monitoring<br>(n=545) | Prostatectomy<br>(n=553) | Radiotherapy<br>(n=545) |
|---------------------------------------------------------|------------------------------|--------------------------|-------------------------|
| Mean age in years at randomization (SD <sup>1</sup> )   | 62 (5)                       | 62 (5)                   | 62 (5)                  |
| White ethnicity (%)                                     | 535 (99)                     | 542 (99)                 | 529 (98)                |
| Married or living with partner (%)                      | 457 (84)                     | 458 (84)                 | 460 (85)                |
| Managerial / professional occupation (%)                | 229 (43)                     | 229 (42)                 | 226 (42)                |
| Known family history prostate cancer (%)                | 43 (8)                       | 32 (6)                   | 44 (8)                  |
| Median PSA <sup>2</sup> in ng/ml (Inter-quartile range) | 4.7 (3.7, 6.7)               | 4.9 (3.7, 6.7)           | 4.8 (3.7, 6.7)          |
| Gleason score                                           |                              |                          |                         |
| 6                                                       | 421 (77)                     | 422 (76)                 | 423 (78)                |
| 7                                                       | 111 (20)                     | 120 (22)                 | 108 (20)                |
| 8-10                                                    | 13 (2)                       | 10 (2)                   | 14 (3)                  |
| Missing                                                 | 0                            | 1                        | 0                       |
| Clinical stage                                          |                              |                          |                         |
| T1c                                                     | 410 (75)                     | 410 (74)                 | 429 (79)                |
| T2                                                      | 135 (25)                     | 143 (26)                 | 116 (21)                |

<sup>1</sup> Standard Deviation.

<sup>2</sup> For the large majority of men with PSA measures from the prostate check clinic and prior to biopsy, the mean of these two has been taken.

**Table S1B: Response rates for exemplar outcome measures**

| Assessment point | ICIQ score*             | EPIC sexual function score* | HADS anxiety            |
|------------------|-------------------------|-----------------------------|-------------------------|
|                  | Complete / expected (%) | Complete / expected (%)     | Complete / expected (%) |
| Baseline         | 1244/1539 (81%)         | 726/1011 (72%)              | 1591/1643 (97%)         |
| 6 months         | 1405/1572 (89%)         | 1013/1140 (89%)             | 1428/1638 (87%)         |
| 12 months        | 1377/1612 (85%)         | 1029/1214 (85%)             | 1422/1633 (87%)         |
| 24 months        | 1379/1624 (85%)         | 1131/1362 (83%)             | 1411/1625 (87%)         |
| 36 months        | 1386/1614 (86%)         | 1257/1479 (85%)             | 1410/1614 (87%)         |
| 48 months        | 1383/1602 (86%)         | 1325/1542 (86%)             | 1419/1602 (89%)         |
| 60 months        | 1384/1589 (87%)         | 1367/1587 (86%)             | 1413/1589 (89%)         |
| 72 months        | 1369/1572 (87%)         | 1352/1572 (86%)             | 1388/1572 (88%)         |

\*ICIQ introduced 1<sup>st</sup> October 2001, EPIC introduced 1<sup>st</sup> March 2005; “expected” counts are the number of men for whom an assessment point falls after the introduction of the stated measure.

**Table S2: Tabular presentation of outcomes in the four key domains of urinary, sexual and bowel function and quality of life, and health-related quality of life**

**Table S2A. Urinary function and impact on quality of life: urinary incontinence scores**

|                                             | AM          |     | RP          |     | RT          |     | p-value |
|---------------------------------------------|-------------|-----|-------------|-----|-------------|-----|---------|
|                                             | Mean (SD)   | n   | Mean (SD)   | n   | Mean (SD)   | n   |         |
| <b>ICIQ score</b>                           |             |     |             |     |             |     |         |
| Baseline                                    | 1.3 (2.5)   | 422 | 1.3 (2.4)   | 414 | 1.2 (2.1)   | 408 |         |
| 6 months                                    | 2.0 (3.3)   | 459 | 5.5 (5.2)   | 476 | 2.1 (3.5)   | 471 |         |
| 12 months                                   | 2.2 (3.2)   | 465 | 4.3 (4.2)   | 460 | 1.7 (2.7)   | 457 |         |
| 24 months                                   | 2.2 (3.3)   | 453 | 3.9 (4.1)   | 468 | 2.0 (2.8)   | 458 |         |
| 36 months                                   | 2.4 (3.4)   | 469 | 4.0 (4.3)   | 461 | 2.0 (2.8)   | 456 |         |
| 48 months                                   | 2.6 (3.5)   | 463 | 4.2 (4.1)   | 462 | 2.1 (2.9)   | 458 |         |
| 60 months                                   | 2.5 (3.5)   | 458 | 3.8 (3.7)   | 465 | 2.1 (2.9)   | 461 |         |
| 72 months                                   | 2.9 (3.8)   | 451 | 4.0 (4.0)   | 463 | 2.2 (2.9)   | 455 | <0.001  |
| <b>EPIC urinary incontinence sub-score</b>  |             |     |             |     |             |     |         |
| Baseline                                    | 93.5 (11.3) | 244 | 92.8 (11.6) | 255 | 92.8 (11.0) | 246 |         |
| 6 months                                    | 89.1 (16.0) | 345 | 67.4 (29.1) | 361 | 88.7 (16.8) | 338 |         |
| 12 months                                   | 89.1 (15.3) | 353 | 76.5 (23.7) | 354 | 90.5 (13.5) | 354 |         |
| 24 months                                   | 88.9 (15.0) | 389 | 80.3 (21.4) | 393 | 89.0 (14.1) | 387 |         |
| 36 months                                   | 87.3 (16.7) | 426 | 79.3 (21.8) | 425 | 89.8 (13.5) | 417 |         |
| 48 months                                   | 86.8 (17.4) | 446 | 80.2 (20.3) | 445 | 89.2 (14.4) | 449 |         |
| 60 months                                   | 87.2 (16.8) | 455 | 80.6 (20.2) | 455 | 89.4 (14.4) | 455 |         |
| 72 months                                   | 85.8 (18.5) | 446 | 80.9 (20.2) | 449 | 89.4 (14.0) | 443 | <0.001  |
| <b>ICSmaleSF urinary incontinence score</b> |             |     |             |     |             |     |         |
| Baseline                                    | 1.9 (2.1)   | 471 | 1.8 (1.9)   | 483 | 1.8 (1.8)   | 463 |         |
| 6 months                                    | 2.3 (2.7)   | 470 | 4.6 (4.1)   | 485 | 2.7 (2.5)   | 477 |         |
| 12 months                                   | 2.3 (2.5)   | 483 | 3.8 (3.5)   | 474 | 2.1 (2.2)   | 472 |         |
| 24 months                                   | 2.5 (2.6)   | 470 | 3.7 (3.4)   | 480 | 2.4 (2.3)   | 476 |         |
| 36 months                                   | 2.6 (2.6)   | 478 | 4.0 (3.7)   | 467 | 2.3 (2.2)   | 466 |         |
| 48 months                                   | 2.8 (2.9)   | 480 | 4.0 (3.6)   | 470 | 2.5 (2.4)   | 468 |         |
| 60 months                                   | 2.8 (2.8)   | 467 | 3.8 (3.1)   | 473 | 2.5 (2.4)   | 470 |         |
| 72 months                                   | 3.0 (3.1)   | 461 | 3.8 (3.1)   | 465 | 2.4 (2.4)   | 465 | <0.001  |

**Table S2A continued. Urinary function and impact on quality of life: Urinary incontinence**

|                                                                                                    | AM      |        | RP      |        | RT      |        | p-value |
|----------------------------------------------------------------------------------------------------|---------|--------|---------|--------|---------|--------|---------|
|                                                                                                    | n / N   | (%)    | n / N   | (%)    | n / N   | (%)    |         |
| <b>Completely continent (ICIQ score 0)</b>                                                         |         |        |         |        |         |        |         |
| Baseline                                                                                           | 305/422 | (72.3) | 288/414 | (69.6) | 280/408 | (68.6) |         |
| 6 months                                                                                           | 280/459 | (61.0) | 138/476 | (29.0) | 291/471 | (61.8) |         |
| 12 months                                                                                          | 268/465 | (57.6) | 135/460 | (29.4) | 281/457 | (61.5) |         |
| 24 months                                                                                          | 249/453 | (55.0) | 155/468 | (33.1) | 255/458 | (55.7) |         |
| 36 months                                                                                          | 248/469 | (52.9) | 146/461 | (31.7) | 258/456 | (56.6) |         |
| 48 months                                                                                          | 236/463 | (51.0) | 130/462 | (28.1) | 255/458 | (55.7) |         |
| 60 months                                                                                          | 244/458 | (53.3) | 143/465 | (30.8) | 239/461 | (51.8) |         |
| 72 months                                                                                          | 225/451 | (49.9) | 145/463 | (31.3) | 231/455 | (50.8) | <0.001  |
| <b>One or more pads per day in past 4 weeks (EPIC item)</b>                                        |         |        |         |        |         |        |         |
| Baseline                                                                                           | 1/250   | (0.4)  | 4/256   | (1.6)  | 0/248   | (0.0)  |         |
| 6 months                                                                                           | 15/346  | (4.3)  | 165/362 | (45.6) | 17/343  | (5.0)  |         |
| 12 months                                                                                          | 15/357  | (4.2)  | 95/362  | (26.2) | 13/358  | (3.6)  |         |
| 24 months                                                                                          | 15/392  | (3.8)  | 80/399  | (20.1) | 16/394  | (4.1)  |         |
| 36 months                                                                                          | 22/434  | (5.1)  | 85/434  | (19.6) | 13/430  | (3.0)  |         |
| 48 months                                                                                          | 31/455  | (6.8)  | 77/451  | (17.1) | 16/456  | (3.5)  |         |
| 60 months                                                                                          | 32/461  | (6.9)  | 77/459  | (16.8) | 15/472  | (3.2)  |         |
| 72 months                                                                                          | 38/453  | (8.4)  | 79/455  | (17.4) | 16/452  | (3.5)  | <0.001  |
| <b>Urinary function and impact on quality of life (QoL): Impact of urinary incontinence on QoL</b> |         |        |         |        |         |        |         |
|                                                                                                    | AM      |        | RP      |        | RT      |        | p-value |
|                                                                                                    | n / N   | (%)    | n / N   | (%)    | n / N   | (%)    |         |
| <b>ICIQ: Moderate to large interference (score 4+) versus mild to no interference (score 0-3)</b>  |         |        |         |        |         |        |         |
| Baseline                                                                                           | 12/428  | (2.8)  | 8/418   | (1.9)  | 9/413   | (2.2)  |         |
| 6 months                                                                                           | 18/464  | (3.9)  | 93/480  | (19.4) | 27/474  | (5.7)  |         |
| 12 months                                                                                          | 25/474  | (5.3)  | 56/469  | (11.9) | 16/462  | (3.5)  |         |
| 24 months                                                                                          | 23/458  | (5.0)  | 50/469  | (10.7) | 20/462  | (4.3)  |         |
| 36 months                                                                                          | 32/473  | (6.8)  | 56/465  | (12.0) | 17/460  | (3.7)  |         |
| 48 months                                                                                          | 38/467  | (8.1)  | 51/466  | (10.9) | 13/459  | (2.8)  |         |
| 60 months                                                                                          | 37/460  | (8.0)  | 43/467  | (9.2)  | 20/467  | (4.3)  |         |
| 72 months                                                                                          | 38/455  | (8.4)  | 58/464  | (12.5) | 21/458  | (4.6)  | <0.001  |



**Table S2A continued. Urinary function and impact on quality of life: Urinary symptom scores**

|                                                      | AM          |     | RP          |     | RT          |     | p-value |
|------------------------------------------------------|-------------|-----|-------------|-----|-------------|-----|---------|
|                                                      | Mean (SD)   | n   | Mean (SD)   | n   | Mean (SD)   | n   |         |
| <b>ICSmaleSF voiding score</b>                       |             |     |             |     |             |     |         |
| Baseline                                             | 3.4 (2.9)   | 471 | 3.3 (3.1)   | 480 | 3.1 (2.9)   | 462 |         |
| 6 months                                             | 3.8 (3.4)   | 473 | 3.2 (3.2)   | 483 | 5.1 (4.1)   | 476 |         |
| 12 months                                            | 3.7 (3.2)   | 484 | 2.8 (2.9)   | 480 | 3.1 (2.8)   | 470 |         |
| 24 months                                            | 3.9 (3.4)   | 474 | 2.5 (2.7)   | 481 | 3.2 (3.0)   | 478 |         |
| 36 months                                            | 4.0 (3.3)   | 481 | 2.8 (2.9)   | 475 | 3.3 (3.0)   | 472 |         |
| 48 months                                            | 4.0 (3.4)   | 481 | 2.8 (2.9)   | 470 | 3.3 (2.9)   | 474 |         |
| 60 months                                            | 4.1 (3.6)   | 470 | 2.9 (2.8)   | 476 | 3.5 (3.0)   | 482 |         |
| 72 months                                            | 4.2 (3.6)   | 464 | 2.9 (2.9)   | 469 | 3.3 (3.0)   | 468 | <0.001  |
| <b>EPIC urinary summary score</b>                    |             |     |             |     |             |     |         |
| Baseline                                             | 93.0 (9.6)  | 249 | 91.9 (9.4)  | 257 | 93.2 (8.3)  | 247 |         |
| 6 months                                             | 90.6 (10.7) | 347 | 80.1 (16.6) | 364 | 84.7 (13.8) | 343 |         |
| 12 months                                            | 91.2 (10.1) | 354 | 86.5 (13.2) | 364 | 91.9 (9.0)  | 359 |         |
| 24 months                                            | 90.3 (10.9) | 392 | 88.1 (12.3) | 401 | 91.4 (9.8)  | 393 |         |
| 36 months                                            | 89.3 (11.5) | 433 | 87.9 (12.1) | 433 | 91.7 (9.2)  | 425 |         |
| 48 months                                            | 89.2 (12.5) | 455 | 88.6 (11.9) | 451 | 91.4 (9.6)  | 455 |         |
| 60 months                                            | 89.6 (11.3) | 461 | 88.9 (11.1) | 460 | 91.3 (9.6)  | 469 |         |
| 72 months                                            | 89.0 (12.5) | 454 | 88.7 (11.3) | 455 | 91.4 (9.2)  | 452 | <0.001  |
| <b>EPIC urinary bother sub-score</b>                 |             |     |             |     |             |     |         |
| Baseline                                             | 91.2 (12.3) | 250 | 89.9 (12.2) | 256 | 92.1 (10.3) | 246 |         |
| 6 months                                             | 89.0 (12.9) | 345 | 81.4 (17.4) | 364 | 80.4 (17.5) | 342 |         |
| 12 months                                            | 90.0 (12.2) | 354 | 87.7 (14.1) | 365 | 90.6 (11.0) | 359 |         |
| 24 months                                            | 88.6 (13.5) | 390 | 88.9 (13.8) | 399 | 90.3 (11.8) | 391 |         |
| 36 months                                            | 87.5 (14.1) | 433 | 88.7 (13.4) | 434 | 90.3 (11.4) | 426 |         |
| 48 months                                            | 87.9 (14.6) | 458 | 89.5 (13.0) | 445 | 90.4 (11.6) | 457 |         |
| 60 months                                            | 88.3 (13.5) | 460 | 89.9 (11.9) | 457 | 90.2 (11.6) | 467 |         |
| 72 months                                            | 88.0 (13.9) | 457 | 89.7 (11.9) | 453 | 90.3 (11.2) | 452 | 0.095   |
| <b>EPIC urinary obstruction/irritative sub-score</b> |             |     |             |     |             |     |         |
| Baseline                                             | 93.2 (9.5)  | 249 | 92.0 (9.9)  | 257 | 93.8 (7.9)  | 247 |         |
| 6 months                                             | 92.0 (9.6)  | 347 | 88.7 (12.3) | 364 | 84.3 (15.3) | 343 |         |
| 12 months                                            | 92.9 (9.0)  | 354 | 92.8 (9.2)  | 364 | 93.2 (7.9)  | 358 |         |
| 24 months                                            | 91.7 (9.9)  | 392 | 93.4 (8.7)  | 402 | 93.4 (8.5)  | 393 |         |
| 36 months                                            | 91.1 (10.0) | 433 | 93.3 (8.7)  | 433 | 93.3 (7.7)  | 425 |         |
| 48 months                                            | 91.3 (11.2) | 456 | 94.1 (8.6)  | 451 | 93.2 (8.4)  | 455 |         |
| 60 months                                            | 91.7 (9.8)  | 461 | 94.1 (7.6)  | 461 | 93.0 (8.3)  | 469 |         |
| 72 months                                            | 91.5 (11.0) | 454 | 93.7 (7.9)  | 454 | 93.1 (7.7)  | 452 | 0.77    |

**Table S2A continued. Urinary function and impact on quality of life: Urinary symptom items**

|                                                                                                                                 | AM      |        | RP      |        | RT      |        | p-value |
|---------------------------------------------------------------------------------------------------------------------------------|---------|--------|---------|--------|---------|--------|---------|
|                                                                                                                                 | n / N   | (%)    | n / N   | (%)    | n / N   | (%)    |         |
| <b>ICSmaleSF nocturia item: twice or more per night</b>                                                                         |         |        |         |        |         |        |         |
| Baseline                                                                                                                        | 125/539 | (23.0) | 127/547 | (23.2) | 104/537 | (19.4) |         |
| 6 months                                                                                                                        | 144/470 | (30.6) | 192/489 | (39.3) | 282/478 | (59.0) |         |
| 12 months                                                                                                                       | 138/481 | (28.7) | 127/476 | (26.7) | 154/473 | (32.6) |         |
| 24 months                                                                                                                       | 148/469 | (31.6) | 106/481 | (22.0) | 142/474 | (30.0) |         |
| 36 months                                                                                                                       | 164/478 | (34.3) | 117/470 | (24.9) | 144/465 | (31.0) |         |
| 48 months                                                                                                                       | 162/475 | (34.1) | 124/473 | (26.2) | 155/472 | (32.9) |         |
| 60 months                                                                                                                       | 174/466 | (37.3) | 114/474 | (24.1) | 169/467 | (36.2) |         |
| 72 months                                                                                                                       | 188/464 | (40.5) | 126/466 | (27.0) | 159/464 | (34.3) | <0.001  |
| <b>ICSmaleSF daytime frequency more frequent than once every three hours</b>                                                    |         |        |         |        |         |        |         |
| Baseline                                                                                                                        | 164/538 | (30.5) | 179/548 | (32.7) | 173/537 | (32.2) |         |
| 6 months                                                                                                                        | 165/473 | (34.9) | 222/487 | (45.6) | 261/474 | (55.1) |         |
| 12 months                                                                                                                       | 156/483 | (32.3) | 187/477 | (39.2) | 154/470 | (32.8) |         |
| 24 months                                                                                                                       | 161/469 | (34.3) | 156/480 | (32.5) | 162/473 | (34.3) |         |
| 36 months                                                                                                                       | 157/479 | (32.8) | 165/468 | (35.3) | 152/465 | (32.7) |         |
| 48 months                                                                                                                       | 167/476 | (35.1) | 146/469 | (31.1) | 157/472 | (33.3) |         |
| 60 months                                                                                                                       | 159/459 | (34.6) | 161/473 | (34.0) | 149/471 | (31.6) |         |
| 72 months                                                                                                                       | 162/460 | (35.2) | 151/464 | (32.5) | 154/463 | (33.3) | 0.47    |
| <b>ICSmaleSF 'somewhat / a lot' of impact of lower urinary tract symptoms on quality of life versus 'not at all / a little'</b> |         |        |         |        |         |        |         |
| Baseline                                                                                                                        | 20/538  | (3.7)  | 10/548  | (1.8)  | 18/539  | (3.3)  |         |
| 6 months                                                                                                                        | 27/474  | (5.7)  | 84/490  | (17.1) | 60/479  | (12.5) |         |
| 12 months                                                                                                                       | 26/482  | (5.4)  | 41/477  | (8.6)  | 14/473  | (3.0)  |         |
| 24 months                                                                                                                       | 32/471  | (6.8)  | 39/481  | (8.1)  | 17/473  | (3.6)  |         |
| 36 months                                                                                                                       | 35/482  | (7.3)  | 51/470  | (10.6) | 20/467  | (4.3)  |         |
| 48 months                                                                                                                       | 40/478  | (8.4)  | 37/474  | (7.8)  | 20/472  | (4.2)  |         |
| 60 months                                                                                                                       | 34/470  | (7.2)  | 30/475  | (6.3)  | 17/474  | (3.6)  |         |
| 72 months                                                                                                                       | 37/465  | (8.0)  | 43/470  | (9.2)  | 21/465  | (4.5)  | <0.001  |

**Table S2B. Sexual function and impact on quality of life: Erectile dysfunction items**

|                                                                | AM      |        | RP      |        | RT      |        | p-value |
|----------------------------------------------------------------|---------|--------|---------|--------|---------|--------|---------|
|                                                                | n / N   | (%)    | n / N   | (%)    | n / N   | (%)    |         |
| <b>EPIC: Erections firm enough for intercourse</b>             |         |        |         |        |         |        |         |
| Baseline                                                       | 164/243 | (67.5) | 161/245 | (65.7) | 169/247 | (68.4) |         |
| 6 months                                                       | 173/375 | (51.6) | 43/359  | (12.0) | 75/338  | (22.2) |         |
| 12 months                                                      | 167/340 | (49.1) | 52/356  | (14.6) | 132/351 | (37.6) |         |
| 24 months                                                      | 178/378 | (47.1) | 74/391  | (18.9) | 132/388 | (34.0) |         |
| 36 months                                                      | 173/421 | (41.1) | 89/427  | (20.8) | 143/420 | (34.0) |         |
| 48 months                                                      | 163/442 | (36.9) | 90/447  | (20.1) | 142/447 | (31.8) |         |
| 60 months                                                      | 157/449 | (35.0) | 94/464  | (20.3) | 125/462 | (27.1) |         |
| 72 months                                                      | 134/452 | (29.6) | 76/461  | (16.5) | 125/456 | (27.4) | <0.001  |
| <b>EPIC: Moderate or big problem with erectile dysfunction</b> |         |        |         |        |         |        |         |
| Baseline                                                       | 39/239  | (16.3) | 40/247  | (16.2) | 39/245  | (15.9) |         |
| 6 months                                                       | 97/331  | (29.3) | 234/354 | (66.1) | 160/333 | (48.0) |         |
| 12 months                                                      | 98/338  | (29.0) | 222/359 | (61.8) | 135/346 | (39.0) |         |
| 24 months                                                      | 129/375 | (34.4) | 227/395 | (57.5) | 138/377 | (36.6) |         |
| 36 months                                                      | 157/414 | (37.9) | 208/421 | (49.4) | 166/420 | (39.5) |         |
| 48 months                                                      | 159/440 | (36.1) | 226/448 | (50.4) | 171/449 | (38.1) |         |
| 60 months                                                      | 167/443 | (37.7) | 215/460 | (46.7) | 170/462 | (36.8) |         |
| 72 months                                                      | 174/437 | (39.8) | 227/457 | (49.7) | 162/447 | (36.2) | <0.001  |

**Table S2B. Sexual function and impact on quality of life**

|                                                                  | AM          |        | RP          |        | RT          |        | p-value |
|------------------------------------------------------------------|-------------|--------|-------------|--------|-------------|--------|---------|
|                                                                  | n / N       | (%)    | n / N       | (%)    | n / N       | (%)    |         |
| <b>EPIC sexual summary score</b>                                 |             |        |             |        |             |        |         |
| Baseline                                                         | 60.3 (23.5) | 238    | 61.4 (22.7) | 241    | 63.6 (23.1) | 243    |         |
| 6 months                                                         | 51.9 (27.9) | 327    | 25.7 (23.5) | 352    | 31.9 (27.1) | 329    |         |
| 12 months                                                        | 51.5 (27.4) | 333    | 30.1 (23.2) | 352    | 43.2 (27.6) | 346    |         |
| 24 months                                                        | 48.2 (27.5) | 368    | 33.3 (23.3) | 388    | 43.4 (25.2) | 372    |         |
| 36 months                                                        | 45.9 (28.4) | 413    | 33.9 (23.9) | 413    | 42.5 (25.9) | 414    |         |
| 48 months                                                        | 44.5 (26.9) | 432    | 34.3 (24.2) | 444    | 41.8 (25.5) | 443    |         |
| 60 months                                                        | 43.2 (27.4) | 439    | 34.5 (24.0) | 454    | 40.1 (24.4) | 455    |         |
| 72 months                                                        | 40.6 (26.7) | 437    | 32.3 (23.2) | 454    | 41.3 (24.9) | 440    | <0.001  |
| <b>EPIC sexual function sub-scale score</b>                      |             |        |             |        |             |        |         |
| Baseline                                                         | 53.5 (22.8) | 241    | 54.4 (22.9) | 240    | 55.7 (23.0) | 245    |         |
| 6 months                                                         | 45.1 (27.0) | 329    | 19.9 (22.4) | 351    | 23.2 (27.0) | 333    |         |
| 12 months                                                        | 44.4 (27.1) | 332    | 23.6 (22.8) | 352    | 36.6 (27.0) | 345    |         |
| 24 months                                                        | 41.9 (26.7) | 367    | 27.2 (23.4) | 387    | 36.9 (25.1) | 377    |         |
| 36 months                                                        | 39.2 (27.4) | 418    | 26.9 (23.7) | 420    | 35.7 (25.5) | 419    |         |
| 48 months                                                        | 37.2 (26.5) | 437    | 27.1 (24.2) | 444    | 34.3 (25.4) | 446    |         |
| 60 months                                                        | 35.6 (27.3) | 447    | 26.5 (24.4) | 457    | 31.9 (24.8) | 463    |         |
| 72 months                                                        | 32.5 (26.4) | 444    | 23.7 (23.4) | 459    | 32.7 (25.6) | 449    | <0.001  |
| <b>EPIC sexual bother sub-scale score</b>                        |             |        |             |        |             |        |         |
| Baseline                                                         | 76.0 (30.5) | 236    | 77.6 (28.9) | 242    | 80.5 (29.2) | 241    |         |
| 6 months                                                         | 66.9 (35.3) | 327    | 38.7 (35.0) | 351    | 51.9 (39.3) | 330    |         |
| 12 months                                                        | 67.8 (34.3) | 335    | 44.5 (34.1) | 353    | 57.6 (36.5) | 345    |         |
| 24 months                                                        | 62.2 (35.4) | 373    | 46.8 (33.1) | 392    | 57.9 (33.5) | 371    |         |
| 36 months                                                        | 60.7 (36.3) | 414    | 49.6 (34.8) | 413    | 57.1 (34.9) | 416    |         |
| 48 months                                                        | 60.4 (35.8) | 433    | 50.4 (34.2) | 443    | 58.2 (34.7) | 446    |         |
| 60 months                                                        | 60.1 (36.3) | 441    | 52.6 (35.1) | 456    | 58.9 (35.3) | 459    |         |
| 72 months                                                        | 57.9 (36.6) | 434    | 51.4 (35.5) | 448    | 60.1 (34.9) | 443    | <0.001  |
| <b>EPIC: Moderate/severe impact of sexual dysfunction on QoL</b> |             |        |             |        |             |        |         |
| Baseline                                                         | 44/239      | (18.4) | 39/245      | (15.9) | 31/244      | (12.7) |         |
| 6 months                                                         | 91/328      | (27.7) | 226/355     | (63.6) | 152/334     | (45.5) |         |
| 12 months                                                        | 95/335      | (28.4) | 191/355     | (53.8) | 135/348     | (38.8) |         |
| 24 months                                                        | 129/375     | (34.4) | 194/395     | (49.1) | 137/378     | (36.2) |         |
| 36 months                                                        | 140/414     | (33.8) | 188/417     | (45.1) | 153/418     | (36.6) |         |
| 48 months                                                        | 147/436     | (33.7) | 197/451     | (43.7) | 157/447     | (35.1) |         |
| 60 months                                                        | 154/444     | (34.7) | 208/462     | (45.0) | 143/461     | (31.0) |         |
| 72 months                                                        | 164/438     | (37.4) | 190/457     | (41.6) | 150/448     | (33.5) | <0.001  |

**Table S2C. Bowel function and impact on QoL: Overall bowel function scores**

|                                            | AM          |     | RP          |     | RT          |     | p-value |
|--------------------------------------------|-------------|-----|-------------|-----|-------------|-----|---------|
|                                            | Mean (SD)   | n   | Mean (SD)   | n   | Mean (SD)   | n   |         |
| <b>EPIC bowel summary score</b>            |             |     |             |     |             |     |         |
| Baseline                                   | 92.8 (9.1)  | 247 | 93.1 (8.9)  | 254 | 94.8 (6.9)  | 247 |         |
| 6 months                                   | 92.8 (9.1)  | 348 | 92.9 (9.0)  | 363 | 86.3 (16.0) | 345 |         |
| 12 months                                  | 93.4 (8.6)  | 356 | 94.0 (7.7)  | 362 | 90.5 (12.2) | 358 |         |
| 24 months                                  | 93.2 (9.4)  | 394 | 93.8 (8.2)  | 405 | 89.3 (12.8) | 391 |         |
| 36 months                                  | 92.8 (10.8) | 433 | 93.8 (8.0)  | 436 | 90.8 (11.2) | 430 |         |
| 48 months                                  | 92.9 (11.2) | 456 | 93.7 (8.9)  | 458 | 91.2 (11.2) | 454 |         |
| 60 months                                  | 93.1 (10.1) | 461 | 94.0 (7.9)  | 469 | 91.0 (10.6) | 473 |         |
| 72 months                                  | 93.0 (9.8)  | 457 | 93.2 (8.7)  | 463 | 91.2 (10.9) | 466 | <0.001  |
| <b>EPIC bowel function sub-scale score</b> |             |     |             |     |             |     |         |
| Baseline                                   | 91.6 (9.0)  | 249 | 91.4 (9.3)  | 254 | 92.9 (8.0)  | 249 |         |
| 6 months                                   | 91.4 (9.8)  | 348 | 91.7 (8.8)  | 363 | 86.3 (14.9) | 347 |         |
| 12 months                                  | 92.1 (8.6)  | 357 | 92.8 (8.1)  | 363 | 90.3 (11.1) | 358 |         |
| 24 months                                  | 92.2 (19.1) | 395 | 92.6 (8.5)  | 406 | 89.5 (10.7) | 391 |         |
| 36 months                                  | 91.9 (10.0) | 435 | 92.7 (8.1)  | 437 | 90.7 (10.1) | 432 |         |
| 48 months                                  | 92.2 (10.8) | 459 | 93.0 (8.4)  | 458 | 90.7 (10.1) | 458 |         |
| 60 months                                  | 92.0 (9.5)  | 461 | 92.9 (7.7)  | 469 | 90.3 (10.1) | 473 |         |
| 72 months                                  | 92.3 (9.7)  | 461 | 92.3 (8.6)  | 463 | 90.8 (9.7)  | 466 | <0.001  |
| <b>EPIC bowel bother sub-scale score</b>   |             |     |             |     |             |     |         |
| Baseline                                   | 94.0 (11.8) | 248 | 94.7 (10.3) | 256 | 96.8 (7.1)  | 247 |         |
| 6 months                                   | 94.2 (10.6) | 348 | 94.0 (10.7) | 363 | 86.4 (18.7) | 345 |         |
| 12 months                                  | 94.7 (10.4) | 356 | 95.2 (9.1)  | 363 | 90.7 (14.9) | 359 |         |
| 24 months                                  | 94.2 (11.7) | 394 | 95.0 (9.4)  | 405 | 89.2 (16.7) | 395 |         |
| 36 months                                  | 93.7 (13.1) | 437 | 94.9 (9.8)  | 439 | 90.9 (14.3) | 431 |         |
| 48 months                                  | 93.8 (12.7) | 459 | 94.6 (11.1) | 459 | 91.7 (13.8) | 456 |         |
| 60 months                                  | 94.1 (12.2) | 470 | 95.1 (9.6)  | 473 | 91.6 (13.2) | 480 |         |
| 72 months                                  | 93.7 (11.6) | 460 | 94.2 (10.8) | 465 | 91.7 (13.7) | 472 | <0.001  |

**Table S2C continued. Bowel function and impact on quality of life: Bowel function items**

|                                                                   | AM     |        | RP     |        | RT     |        | p-value |
|-------------------------------------------------------------------|--------|--------|--------|--------|--------|--------|---------|
|                                                                   | n / N  | (%)    | n / N  | (%)    | n / N  | (%)    |         |
| <b>EPIC: Fecal incontinence more than once per week</b>           |        |        |        |        |        |        |         |
| Baseline                                                          | 5/249  | (2.0)  | 7/255  | (2.8)  | 1/250  | (0.4)  |         |
| 6 months                                                          | 6/348  | (1.7)  | 4/367  | (1.1)  | 18/346 | (5.2)  |         |
| 12 months                                                         | 4/356  | (1.1)  | 3/363  | (0.8)  | 14/358 | (3.9)  |         |
| 24 months                                                         | 10/395 | (2.5)  | 8/406  | (2.0)  | 17/393 | (4.3)  |         |
| 36 months                                                         | 10/436 | (2.3)  | 8/437  | (1.8)  | 11/433 | (2.5)  |         |
| 48 months                                                         | 12/460 | (2.6)  | 8/459  | (1.7)  | 11/458 | (2.4)  |         |
| 60 months                                                         | 11/463 | (2.4)  | 6/472  | (1.3)  | 11/476 | (2.3)  |         |
| 72 months                                                         | 12/462 | (2.6)  | 9/468  | (1.9)  | 19/465 | (4.1)  | 0.027   |
| <b>EPIC: Loose stools about half the time or more frequently</b>  |        |        |        |        |        |        |         |
| Baseline                                                          | 43/249 | (17.3) | 36/255 | (14.2) | 39/250 | (15.6) |         |
| 6 months                                                          | 68/348 | (19.5) | 51/366 | (13.9) | 87/347 | (25.1) |         |
| 12 months                                                         | 57/357 | (16.0) | 45/363 | (12.4) | 77/358 | (21.5) |         |
| 24 months                                                         | 56/396 | (14.1) | 57/406 | (14.0) | 77/392 | (19.6) |         |
| 36 months                                                         | 65/436 | (14.9) | 50/435 | (11.5) | 68/433 | (15.7) |         |
| 48 months                                                         | 68/461 | (14.8) | 46/460 | (10.0) | 73/459 | (15.9) |         |
| 60 months                                                         | 66/465 | (14.2) | 57/473 | (12.1) | 85/475 | (17.9) |         |
| 72 months                                                         | 61/466 | (13.1) | 57/468 | (12.2) | 72/466 | (15.5) | <0.001  |
| <b>EPIC: Bloody stools about half the time or more frequently</b> |        |        |        |        |        |        |         |
| Baseline                                                          | 5/247  | (2.0)  | 3/255  | (1.2)  | 4/250  | (1.6)  |         |
| 6 months                                                          | 7/348  | (2.0)  | 1/363  | (0.3)  | 13/347 | (3.8)  |         |
| 12 months                                                         | 5/357  | (1.4)  | 2/364  | (0.6)  | 14/357 | (3.9)  |         |
| 24 months                                                         | 3/396  | (0.8)  | 1/407  | (0.3)  | 29/392 | (7.4)  |         |
| 36 months                                                         | 7/435  | (1.6)  | 5/436  | (1.2)  | 32/433 | (7.4)  |         |
| 48 months                                                         | 10/460 | (2.2)  | 4/459  | (0.9)  | 34/459 | (7.4)  |         |
| 60 months                                                         | 10/465 | (2.2)  | 4/471  | (0.9)  | 40/476 | (8.4)  |         |
| 72 months                                                         | 6/465  | (1.3)  | 5/470  | (1.1)  | 26/466 | (5.6)  | <0.001  |

**Table S2C continued: Bowel function and impact on quality of life**

|                                                                        | AM     |       | RP     |       | RT     |        | p-value |
|------------------------------------------------------------------------|--------|-------|--------|-------|--------|--------|---------|
|                                                                        | n / N  | (%)   | n / N  | (%)   | n / N  | (%)    |         |
| <b>EPIC: Moderate/severe impact of bowel habits on quality of life</b> |        |       |        |       |        |        |         |
| Baseline                                                               | 11/249 | (4.4) | 5/255  | (2.0) | 4/247  | (1.6)  |         |
| 6 months                                                               | 11/348 | (3.2) | 12/362 | (3.3) | 36/345 | (10.4) |         |
| 12 months                                                              | 6/358  | (1.7) | 9/364  | (2.5) | 21/359 | (5.9)  |         |
| 24 months                                                              | 10/395 | (2.5) | 6/407  | (1.5) | 25/395 | (6.3)  |         |
| 36 months                                                              | 11/439 | (2.5) | 9/439  | (2.1) | 20/432 | (4.6)  |         |
| 48 months                                                              | 14/461 | (3.0) | 10/459 | (2.2) | 14/458 | (3.1)  |         |
| 60 months                                                              | 16/471 | (3.4) | 11/473 | (2.3) | 18/480 | (3.8)  |         |
| 72 months                                                              | 16/463 | (3.5) | 12/467 | (2.6) | 10/472 | (2.1)  | 0.003   |

**Table S2D. Health-related quality of life: Generic health status scores**

|                                         | AM          |     | RP         |     | RT         |     | p-value |
|-----------------------------------------|-------------|-----|------------|-----|------------|-----|---------|
|                                         | Mean (SD)   | n   | Mean (SD)  | n   | Mean (SD)  | n   |         |
| <b>SF-12: Physical health sub-scale</b> |             |     |            |     |            |     |         |
| Baseline                                | 49.9 (8.9)  | 514 | 51.0 (8.1) | 512 | 51.0 (7.7) | 507 |         |
| 6 months                                | 50.0 (8.7)  | 430 | 47.4 (9.7) | 443 | 48.7 (8.8) | 437 |         |
| 12 months                               | 49.9 (9.1)  | 453 | 49.9 (8.5) | 447 | 50.2 (8.6) | 440 |         |
| 24 months                               | 49.5 (9.1)  | 444 | 50.4 (8.3) | 437 | 49.9 (8.9) | 438 |         |
| 36 months                               | 48.5 (9.8)  | 444 | 49.4 (8.7) | 440 | 49.7 (8.9) | 438 |         |
| 48 months                               | 48.7 (9.3)  | 446 | 49.1 (8.7) | 440 | 48.9 (9.4) | 441 |         |
| 60 months                               | 48.3 (9.4)  | 440 | 48.6 (9.2) | 429 | 48.1 (9.7) | 437 |         |
| 72 months                               | 46.9 (10.6) | 428 | 48.8 (9.1) | 428 | 48.4 (9.4) | 428 | 0.65    |
| <b>SF-12: Mental health sub-scale</b>   |             |     |            |     |            |     |         |
| Baseline                                | 53.3 (8.1)  | 514 | 53.7 (8.0) | 512 | 54.1 (6.8) | 507 |         |
| 6 months                                | 53.1 (8.6)  | 430 | 52.5 (9.1) | 443 | 52.2 (8.7) | 437 |         |
| 12 months                               | 53.6 (8.1)  | 453 | 53.7 (8.3) | 447 | 53.3 (8.5) | 440 |         |
| 24 months                               | 53.3 (8.3)  | 444 | 53.5 (8.6) | 437 | 52.9 (8.5) | 438 |         |
| 36 months                               | 53.1 (8.5)  | 444 | 53.8 (8.3) | 440 | 53.9 (7.9) | 438 |         |
| 48 months                               | 53.6 (8.4)  | 446 | 54.3 (7.9) | 440 | 53.8 (8.0) | 441 |         |
| 60 months                               | 52.9 (8.9)  | 440 | 53.8 (7.9) | 429 | 53.8 (8.1) | 437 |         |
| 72 months                               | 53.0 (8.8)  | 428 | 53.5 (8.3) | 428 | 53.8 (7.8) | 428 | 0.47    |



**Table S2D continued. Health-related quality of life: Hospital Anxiety and Depression Scale (HADS) scores**

|                                          | AM        |     | RP        |     | RT        |     | p-value |
|------------------------------------------|-----------|-----|-----------|-----|-----------|-----|---------|
|                                          | Mean (SD) | n   | Mean (SD) | n   | Mean (SD) | n   |         |
| <b>HADS: Anxiety sub-scale scores</b>    |           |     |           |     |           |     |         |
| Baseline                                 | 5.1 (3.6) | 529 | 5.0 (3.5) | 539 | 4.6 (3.3) | 523 |         |
| 6 months                                 | 3.9 (3.7) | 467 | 4.0 (3.6) | 485 | 4.0 (3.6) | 476 |         |
| 12 months                                | 4.0 (3.6) | 479 | 3.6 (3.6) | 472 | 3.7 (3.6) | 471 |         |
| 24 months                                | 3.9 (3.6) | 467 | 3.6 (3.4) | 474 | 3.7 (3.4) | 470 |         |
| 36 months                                | 3.9 (3.8) | 474 | 3.7 (3.4) | 470 | 3.7 (3.5) | 466 |         |
| 48 months                                | 4.0 (3.9) | 475 | 3.8 (3.5) | 471 | 3.6 (3.3) | 473 |         |
| 60 months                                | 3.8 (3.7) | 464 | 3.6 (3.2) | 470 | 3.6 (3.4) | 479 |         |
| 72 months                                | 4.1 (3.9) | 458 | 3.7 (3.5) | 465 | 3.4 (3.2) | 465 | 0.20    |
| <b>HADS: Depression sub-scale scores</b> |           |     |           |     |           |     |         |
| Baseline                                 | 2.7 (2.7) | 530 | 2.5 (2.5) | 539 | 2.4 (2.5) | 524 |         |
| 6 months                                 | 2.4 (3.0) | 470 | 2.8 (3.0) | 487 | 2.7 (3.0) | 478 |         |
| 12 months                                | 2.4 (2.8) | 481 | 2.4 (2.9) | 475 | 2.5 (2.7) | 470 |         |
| 24 months                                | 2.6 (3.0) | 472 | 2.5 (2.7) | 480 | 2.6 (2.9) | 471 |         |
| 36 months                                | 2.7 (3.2) | 476 | 2.5 (2.8) | 471 | 2.7 (3.0) | 467 |         |
| 48 months                                | 2.7 (3.1) | 476 | 2.6 (3.0) | 471 | 2.7 (3.0) | 476 |         |
| 60 months                                | 2.8 (3.1) | 466 | 2.6 (2.9) | 471 | 2.7 (3.0) | 480 |         |
| 72 months                                | 3.1 (3.4) | 464 | 2.7 (3.1) | 459 | 2.7 (2.9) | 464 | 0.85    |

**Table S2D continued. Health-related quality of life: Hospital Anxiety and Depression Scale (HADS) cases**

|                                                  | AM      |        | RP      |        | RT     |        | p-value |
|--------------------------------------------------|---------|--------|---------|--------|--------|--------|---------|
|                                                  | n / N   | (%)    | n / N   | (%)    | n / N  | (%)    |         |
| <b>HADS: Anxiety possible case scoring 8+</b>    |         |        |         |        |        |        |         |
| Baseline                                         | 120/529 | (22.7) | 107/539 | (19.9) | 93/523 | (17.8) |         |
| 6 months                                         | 75/467  | (16.1) | 71/485  | (14.6) | 74/476 | (15.6) |         |
| 12 months                                        | 84/479  | (17.5) | 61/472  | (12.9) | 62/471 | (13.2) |         |
| 24 months                                        | 70/467  | (15.0) | 58/474  | (12.2) | 61/470 | (13.0) |         |
| 36 months                                        | 76/474  | (16.0) | 56/470  | (11.9) | 68/466 | (14.6) |         |
| 48 months                                        | 68/475  | (14.3) | 65/471  | (13.8) | 62/473 | (13.1) |         |
| 60 months                                        | 75/464  | (16.2) | 55/470  | (11.7) | 67/479 | (14.0) |         |
| 72 months                                        | 69/458  | (15.1) | 69/465  | (14.8) | 53/465 | (11.4) | 0.27    |
| <b>HADS: Depression possible case scoring 8+</b> |         |        |         |        |        |        |         |
| Baseline                                         | 41/530  | (7.7)  | 32/539  | (5.9)  | 26/524 | (5.0)  |         |
| 6 months                                         | 31/470  | (6.6)  | 37/487  | (7.6)  | 37/478 | (7.7)  |         |
| 12 months                                        | 27/481  | (5.6)  | 36/475  | (7.6)  | 32/470 | (6.8)  |         |
| 24 months                                        | 33/472  | (7.0)  | 34/480  | (7.1)  | 33/471 | (7.0)  |         |
| 36 months                                        | 35/476  | (7.4)  | 30/471  | (6.4)  | 38/467 | (8.1)  |         |
| 48 months                                        | 38/476  | (8.0)  | 43/471  | (9.1)  | 40/476 | (8.4)  |         |
| 60 months                                        | 42/466  | (9.0)  | 38/471  | (8.1)  | 44/480 | (9.2)  |         |
| 72 months                                        | 47/464  | (10.1) | 43/459  | (9.4)  | 35/464 | (7.5)  | 0.96    |

**Table S2D continued. Cancer-specific quality of life: EORTC-QLQ-C30 at 5 years**

|                                 | AM          |     | RP          |     | RT          |     | p-value |
|---------------------------------|-------------|-----|-------------|-----|-------------|-----|---------|
|                                 | Mean (SD)   | n   | Mean (SD)   | n   | Mean (SD)   | n   |         |
| Global health status            | 76.8 (17.6) | 394 | 78.4 (17.7) | 386 | 77.4 (19.0) | 400 | 0.38    |
| <b>Functional scales</b>        |             |     |             |     |             |     |         |
| Physical                        | 90.9 (14.7) | 395 | 91.6 (13.8) | 383 | 91.3 (14.1) | 396 | 0.81    |
| Role                            | 90.5 (19.7) | 395 | 90.9 (19.0) | 383 | 89.5 (20.1) | 396 | 0.60    |
| Emotional                       | 87.3 (17.3) | 394 | 87.9 (16.0) | 386 | 87.7 (16.6) | 398 | 0.79    |
| Cognitive                       | 86.0 (15.4) | 394 | 87.9 (14.4) | 386 | 87.3 (15.7) | 399 | 0.21    |
| Social                          | 91.3 (17.2) | 394 | 91.3 (16.8) | 386 | 91.6 (17.8) | 399 | 0.95    |
| <b>Symptom scales and items</b> |             |     |             |     |             |     |         |
| Fatigue                         | 19.0 (19.4) | 395 | 17.1 (17.9) | 383 | 17.3 (17.1) | 395 | 0.24    |
| Nausea and vomiting             | 2.0 (7.1)   | 395 | 1.4 (6.2)   | 383 | 1.7 (5.9)   | 397 | 0.44    |
| Pain                            | 12.0 (20.5) | 396 | 9.7 (18.1)  | 386 | 11.9 (20.2) | 400 | 0.20    |
| Dyspnoea                        | 12.4 (22.1) | 394 | 10.1 (20.0) | 383 | 11.3 (19.9) | 397 | 0.34    |
| Insomnia                        | 18.3 (25.6) | 393 | 14.6 (22.4) | 383 | 16.0 (23.1) | 396 | 0.08    |
| Appetite loss                   | 4.9 (13.6)  | 395 | 3.8 (11.9)  | 383 | 4.2 (13.2)  | 397 | 0.56    |
| Constipation                    | 6.4 (15.7)  | 394 | 4.6 (14.3)  | 381 | 5.1 (14.0)  | 396 | 0.25    |
| Diarrhoea                       | 6.0 (15.3)  | 390 | 6.0 (16.4)  | 384 | 5.6 (13.7)  | 400 | 0.89    |
| Financial difficulties          | 3.1 (13.8)  | 394 | 3.4 (12.7)  | 383 | 2.8 (11.9)  | 398 | 0.80    |

### **Section S3:**

## **Some factors relating to the design and analysis of the ProtecT trial and its treatment policies that could affect patient-reported outcome measure scores**

Several factors related to the design and analysis of the ProtecT trial and its treatment policies may have influenced some overall patient-reported outcome scores. These factors include:

#### *(a) The timing of receipt of radical treatment*

The immediate receipt of prostatectomy by 68% and radiotherapy by 73% in these arms (Table S3A below) will probably have attenuated some scores, and in the active monitoring arm, the increasing numbers of men receiving radical treatments will have conflated outcomes, contributing to the gradual worsening of scores. Table S3B below shows that men remaining on active monitoring had lower pad-use and less erectile dysfunction than those in the full allocated active monitoring arm - although this exploratory subgroup analysis requires cautious interpretation.

#### *(b) Receipt of neo-adjuvant androgen deprivation with radiotherapy*

The assessment of patient-reported outcomes at six months post-randomization will have captured the impact of neo-adjuvant androgen suppression on sexual function in the radiotherapy arm.

#### *(c) The effects of therapies to ameliorate the side-effects of treatments.*

The ProtecT trial was designed as a pragmatic study carried out in nine centers within the UK and so treatment pathways were outlined in the trial protocol to reflect best practice in the NHS with all centers following established clinical guidelines for clinical care. Guidelines include those produced by NICE (UK National Institute for Health and Care Excellence) and EAU (European Association of Urology) specifically for therapies to ameliorate the side effects of the study interventions, as well as the similar AUA (American Urology Association) guidelines for treatment of erectile dysfunction. In relation to specific treatments, for urinary incontinence, these included lifestyle advice, containment interventions, behavioral and physical interventions, pharmacological interventions or surgery, depending on severity. For erectile dysfunction, these included pharmacological interventions, intracavernous injections, combination therapies and prostheses, depending on severity. For radiation-induced symptoms, specialist care was sought. The results in this paper represent patient reporting of the overall effect of randomly allocated treatments and ameliorating therapies. Analyses to separate out effects of interventions from concomitant therapies are complex, and the interpretation of the resulting estimates difficult.

#### **Future analyses**

In future analyses, we intend to present patient-reported outcomes according to treatment received and an economic evaluation including assessment of therapies received for treatment impacts, as well as details about the reasons for change of management in the active monitoring arm to further inform individual and clinical decision-making.

**Table S3A Prostatectomy and radical radiotherapy received in each trial arm over time**

|           | Allocated to active monitoring<br>(n=545) |                          | Allocated to prostatectomy<br>(n=553) |                          | Allocated to radiotherapy<br>(n=545) |                          |
|-----------|-------------------------------------------|--------------------------|---------------------------------------|--------------------------|--------------------------------------|--------------------------|
|           | Prostatectomy<br>received                 | Radiotherapy<br>received | Prostatectomy<br>received             | Radiotherapy<br>received | Prostatectomy<br>received            | Radiotherapy<br>received |
|           | n (%)                                     | n (%)                    | n (%)                                 | n (%)                    | n (%)                                | n (%)                    |
| 6 months  | 41 (7.5)                                  | 18 (3.3)                 | 373 (67.5)                            | 30 (5.4)                 | 38 (7.0)                             | 392 (71.9)               |
| 12 months | 49 (9.0)                                  | 24 (4.4)                 | 399 (72.2)                            | 35 (6.3)                 | 42 (7.7)                             | 402 (73.8)               |
| 24 months | 65 (11.9)                                 | 32 (5.9)                 | 403 (72.9)                            | 38 (6.9)                 | 47 (8.6)                             | 409 (75.1)               |
| 36 months | 81 (14.9)                                 | 42 (7.7)                 | 408 (73.8)                            | 38 (6.9)                 | 49 (9.0)                             | 409 (75.1)               |
| 48 months | 97 (17.8)                                 | 50 (9.2)                 | 411 (74.3)                            | 40 (7.2)                 | 53 (9.7)                             | 411 (75.4)               |
| 60 months | 112 (20.6)                                | 60 (11.0)                | 416 (75.2)                            | 44 (8.0)                 | 54 (9.9)                             | 412 (75.6)               |
| 72 months | 121 (22.2)                                | 71 (13.0)                | 417 (75.4)                            | 46 (8.3)                 | 55 (10.1)                            | 414 (76.0)               |

**Table S3B. Tabular presentation of selected EPIC outcomes for urinary incontinence and erectile dysfunction, comparing the active monitoring group with those who were not radically treated within six years of randomization**

|                                                             | Whole group |        | No radical treatment |        |
|-------------------------------------------------------------|-------------|--------|----------------------|--------|
|                                                             | n / N       | (%)    | n / N                | (%)    |
| <b>One or more pads per day in past 4 weeks (EPIC item)</b> |             |        |                      |        |
| Baseline                                                    | 1/250       | (0.4)  | 0/132                | (0.0)  |
| 6 months                                                    | 15/346      | (4.3)  | 0/186                | (0.0)  |
| 12 months                                                   | 15/357      | (4.2)  | 0/191                | (0.0)  |
| 24 months                                                   | 15/392      | (3.8)  | 1/210                | (0.5)  |
| 36 months                                                   | 22/434      | (5.1)  | 1/241                | (0.4)  |
| 48 months                                                   | 31/455      | (6.8)  | 4/258                | (1.6)  |
| 60 months                                                   | 32/461      | (6.9)  | 4/265                | (1.5)  |
| 72 months                                                   | 38/453      | (8.4)  | 5/266                | (1.9)  |
| <b>EPIC: Erections firm enough for intercourse</b>          |             |        |                      |        |
| Baseline                                                    | 164/243     | (67.5) | 81/125               | (64.8) |
| 6 months                                                    | 173/375     | (51.6) | 102/179              | (57.0) |
| 12 months                                                   | 167/340     | (49.1) | 97/182               | (53.3) |
| 24 months                                                   | 178/378     | (47.1) | 104/204              | (51.0) |
| 36 months                                                   | 173/421     | (41.1) | 119/235              | (50.6) |
| 48 months                                                   | 163/442     | (36.9) | 121/256              | (47.3) |
| 60 months                                                   | 157/449     | (35.0) | 114/255              | (44.7) |
| 72 months                                                   | 134/452     | (29.6) | 99/263               | (37.6) |
